# Supplementary material for: Nano-thermometers with thermo-sensitive polymer grafted USPIOs behaving as positive contrast agents in low-field MRI
Source: Royal Society of Chemistry journal article supplement (doi:10.1039/c4nr07064j), 2015-01-01
Supplement: c4nr07064j1.pdf [file c4nr07064j1.pdf]

## Electronic Supplementary Information

### Nano-thermometer with Thermo-sensitive Polymer Grafted USPIOs behaving as Positive Contrast Agents in low-field MRI

Adeline Hannecart,<sup>a</sup> Dimitri Stanicki,<sup>a</sup> Luce Vander Elst,<sup>a,b</sup> Robert N. Muller,<sup>a,b</sup> Sébastien Lecommandoux,<sup>c</sup> Julie Thévenot,<sup>c</sup> Colin Bonduelle,<sup>c</sup> Aurélien Trotier,<sup>d</sup> Philippe Massot,<sup>d</sup> Sylvain Miraux,<sup>d</sup> Olivier Sandre,<sup>\*c</sup> and Sophie Laurent,<sup>\*a,b</sup>

<sup>a</sup>Department of General, Organic and Biomedical Chemistry, NMR and Molecular imaging Laboratory, University of Mons, 19 avenue Maistriau B-7000 Mons, Belgium. Fax: +32-65-373520; Tel: +32-65-373525; E-mail: [sophie.laurent@umons.ac.be](mailto:sophie.laurent@umons.ac.be)

<sup>b</sup>Center for Microscopy and Molecular Imaging, 8 rue Adrienne Bolland, B-6041 Charleroi, Belgium

<sup>c</sup>Laboratoire de Chimie des Polymères Organiques, UMR5629 CNRS / Université de Bordeaux, ENSCBP 16 avenue Pey Berland F-33607 Pessac, France. Fax: +33-5-4000-8487; Tel: +33-5-4000-3695; E-mail: [olivier.sandre@enscbp.fr](mailto:olivier.sandre@enscbp.fr)

<sup>d</sup>Résonance Magnétique des Systèmes Biologiques, UMR 5536 CNRS / Université de Bordeaux 146, rue Léo Saignat, F-33076, Bordeaux France

a)

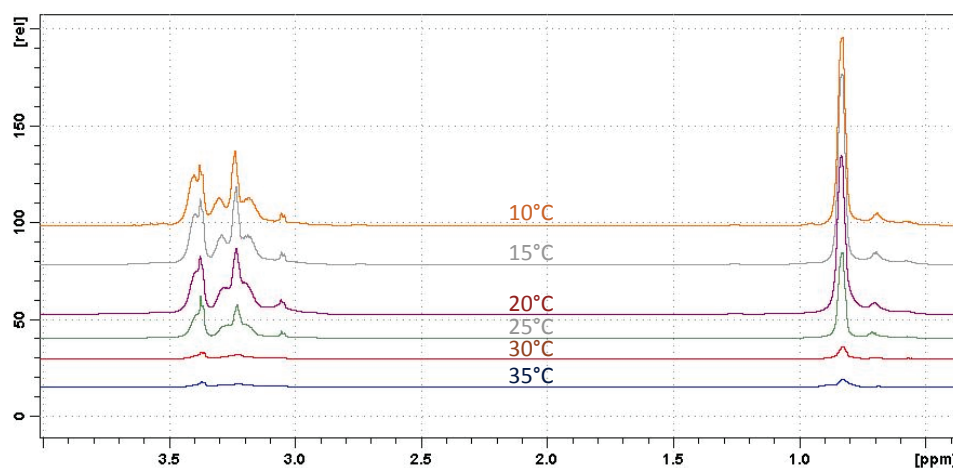

b)

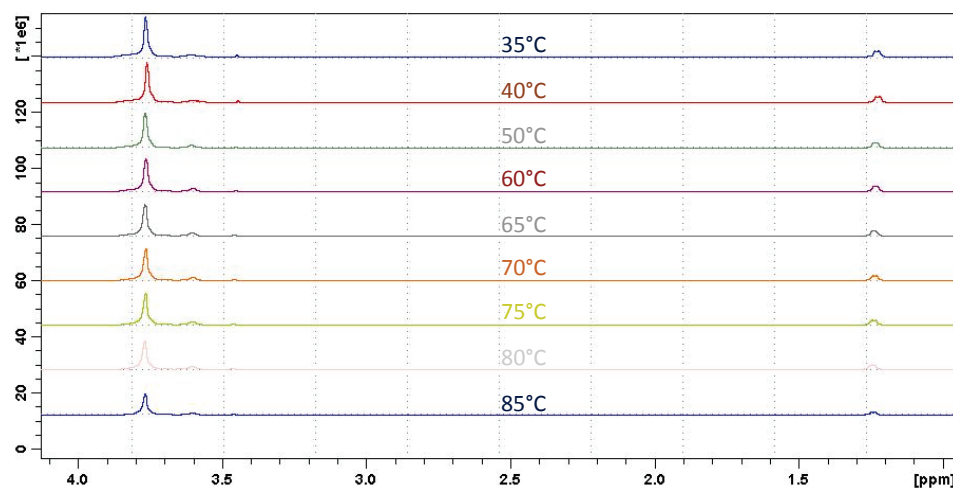

**Fig. S1** a) 500 MHz <sup>1</sup>H NMR spectra of Jeffamine<sup>®</sup> M-2005 in D<sub>2</sub>O (30 mg/ml) at increasing temperatures (10, 15, 20, 25, 30, and 35°C); b) 500 MHz <sup>1</sup>H NMR spectra of Jeffamine<sup>®</sup> M-2070 in D<sub>2</sub>O (30 mg/ml) at increasing temperatures (35, 40, 50, 60, 65, 70, 75, 80, and 85°C).

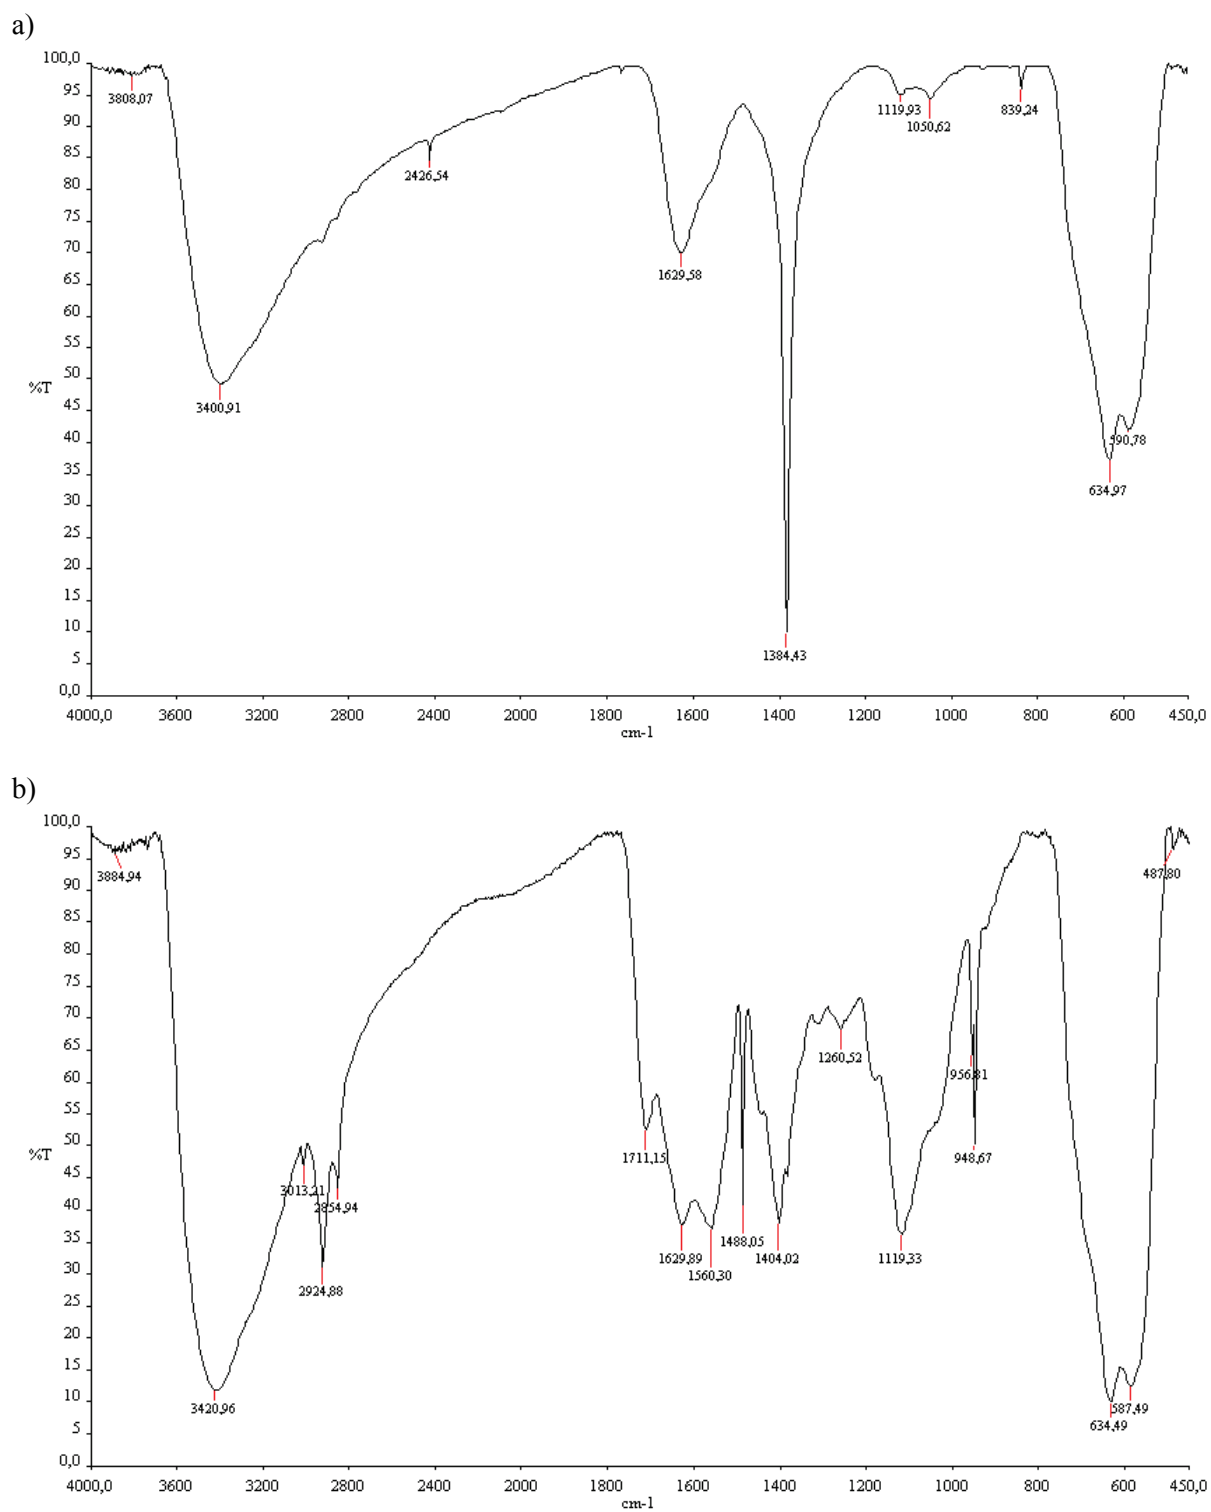

**Fig. S2** FT-IR spectra of iron oxide nanoparticles obtained by coprecipitation (a) and of iron oxide nanoparticles coated with TEPSA (b).

a)

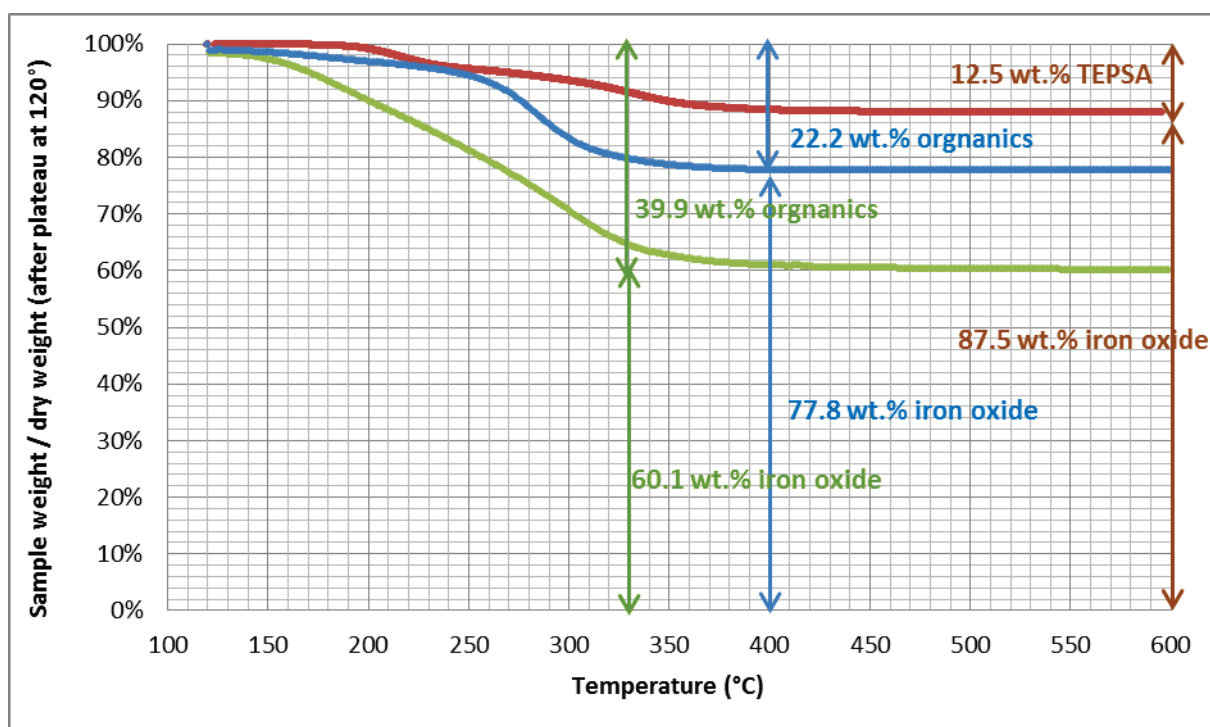

b)

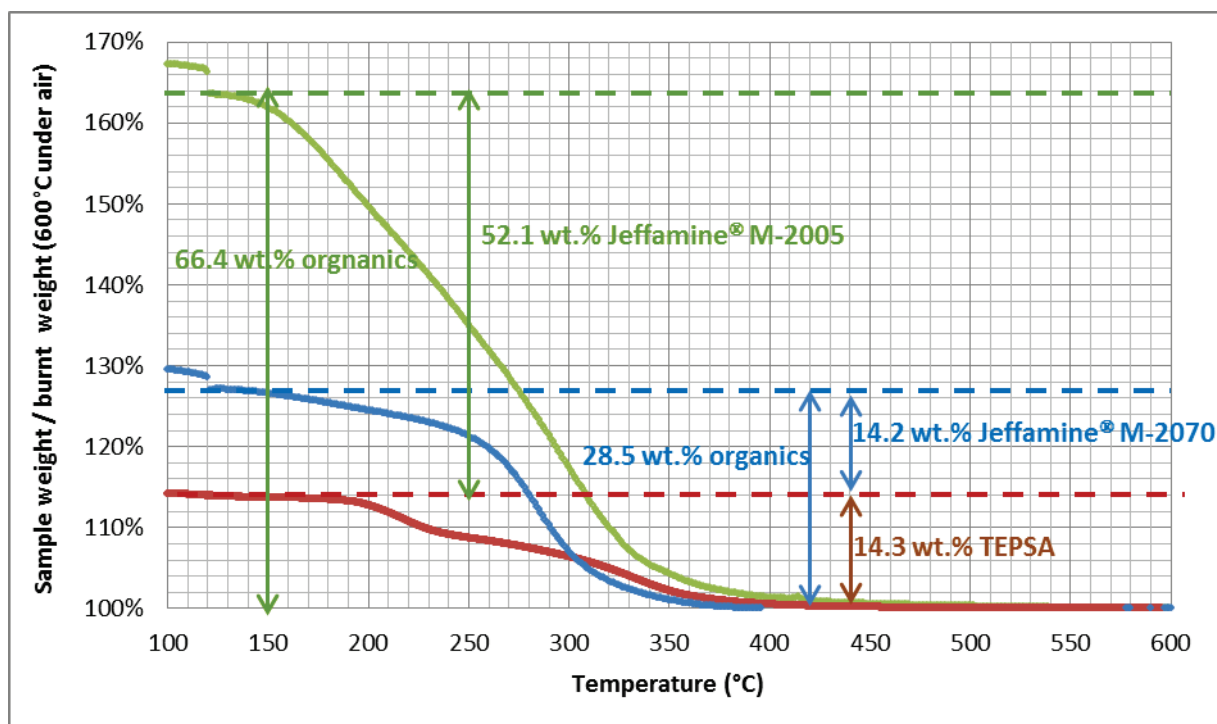

**Fig. S3** Thermogravimetric analyses (TGA) of USPIOs silanized by TEPSA (red curve), and after coupling with Jeffamine<sup>®</sup> M-2005 (green curve) and Jeffamine<sup>®</sup> M-2070 (blue curve). The graphs are normalized either by the dry weight after the plateau at 120°C (a) or by the burnt weight after the treatment at 600°C under air (b), enabling to subtract the silane content from the total organics to get the polymer weight % relatively to iron oxide, see Equation (4) in the text.

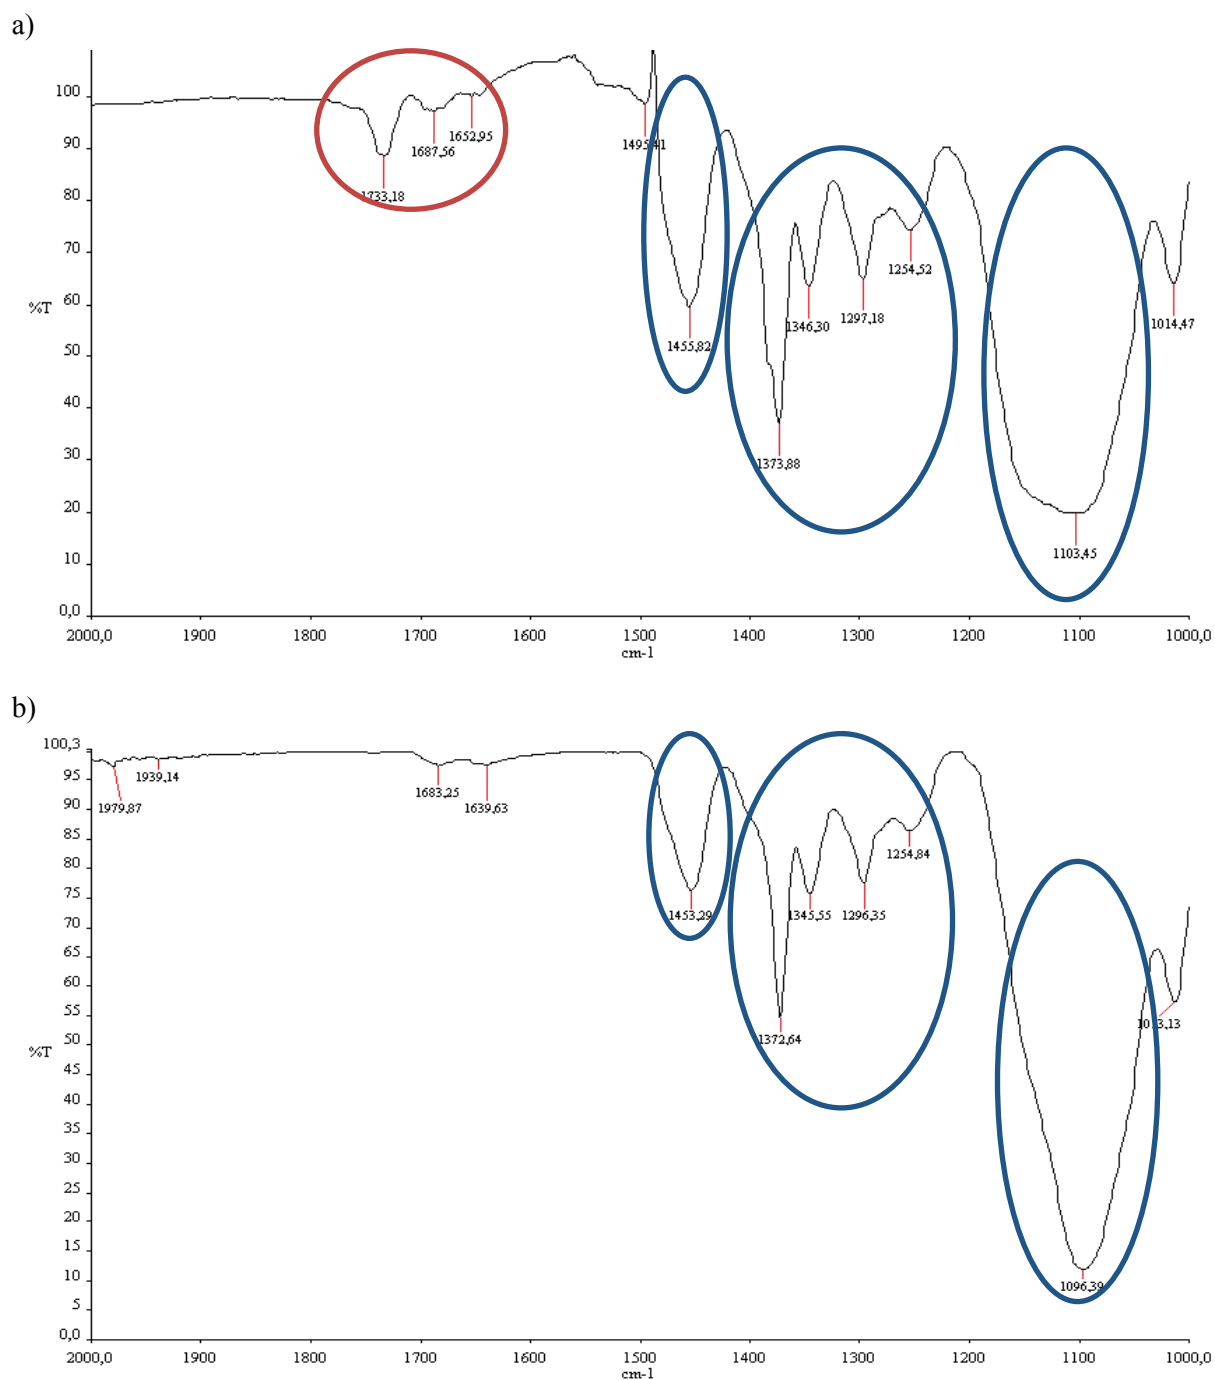

**Fig. S4** a) Difference between the normalized FT-IR spectra of USPIOs coated with TEPSA before and after grafting of Jeffamine<sup>®</sup> M-2005, b) and spectrum of Jeffamine<sup>®</sup> M-2005 alone.

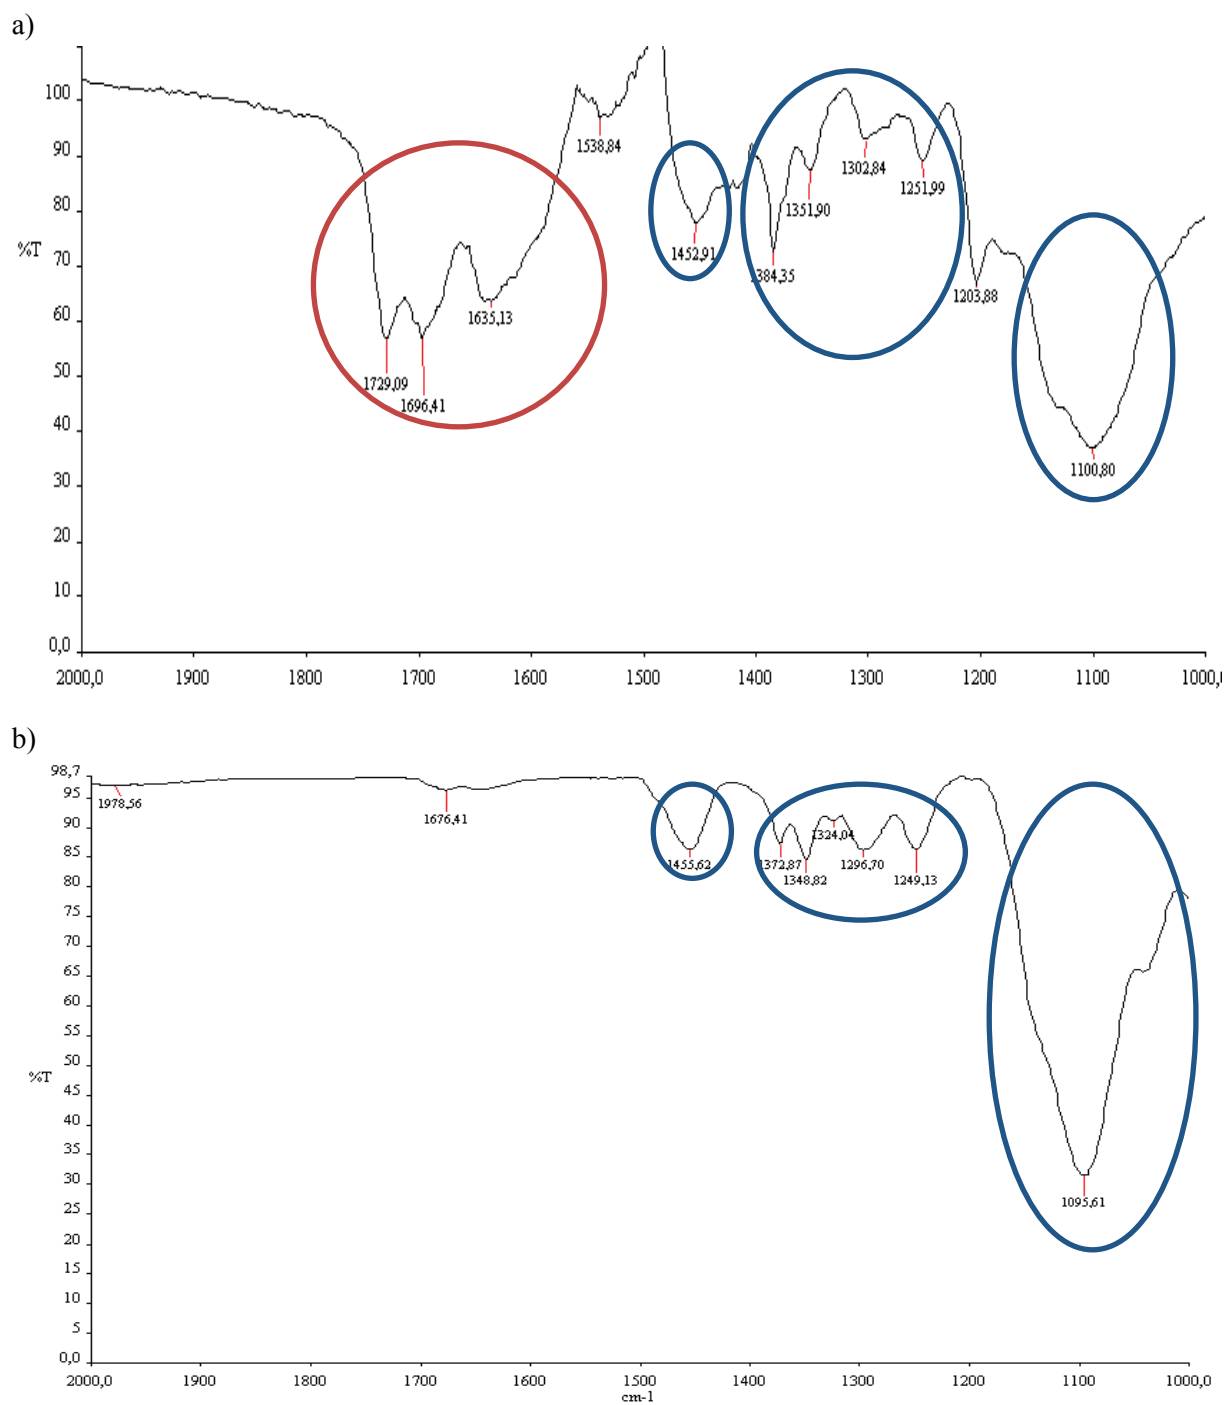

**Fig. S5** a) Difference between the normalized FT-IR spectra of USPIOs coated with TEPSA before and after grafting of Jeffamine<sup>®</sup> M-2070, b) and spectrum of Jeffamine<sup>®</sup> M-2070 alone.

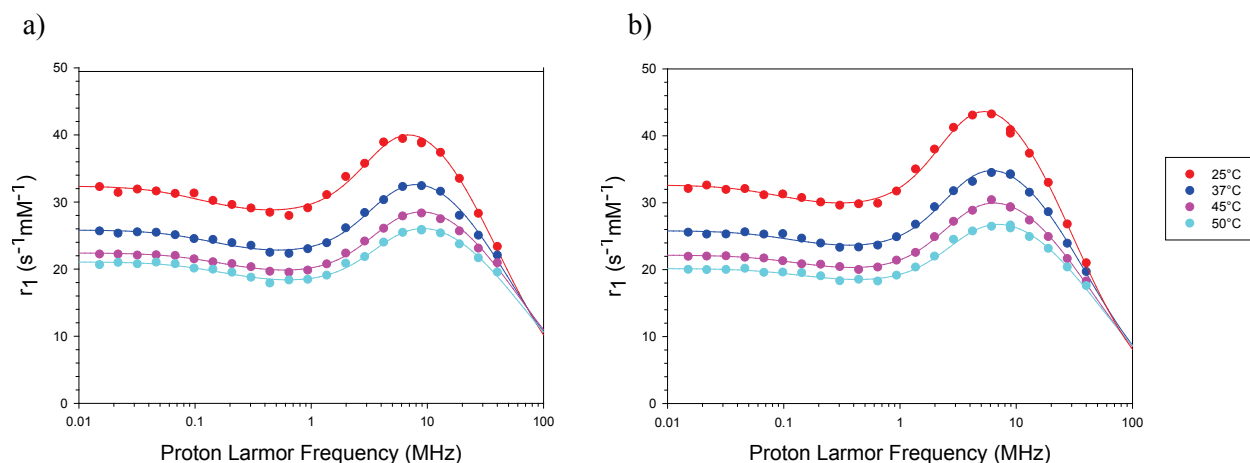

**Fig. S6** NMRD profiles of the longitudinal relaxivity vs. proton Larmor frequency for a) TEPSA-coated USPIOs, and b) USPIOs grafted with Jeffamine<sup>®</sup> M-2070 as a function of temperature.

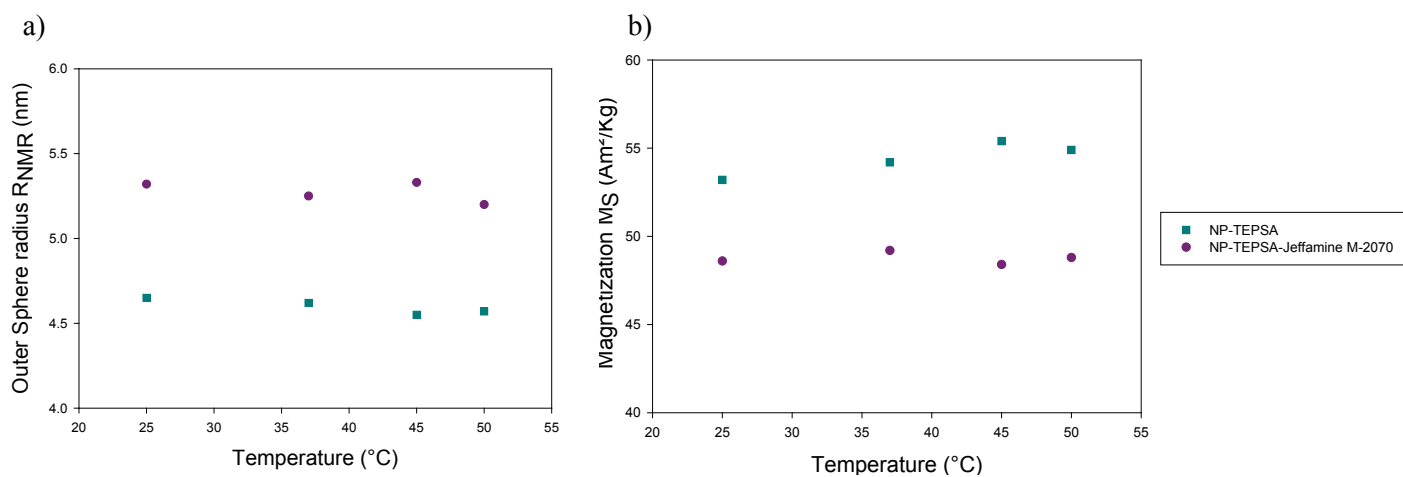

**Fig. S7** a) Outer Sphere radius  $R_{\text{NMR}}$  (nm) and b) saturation magnetization  $M_s$  ( $\text{A}\cdot\text{m}^2\cdot\text{kg}^{-1}$ ) vs. temperature deduced by fitting the NMRD profiles for USPIOs coated by Jeffamine<sup>®</sup> M-2070 (green markers) and TEPSA only (purple markers).

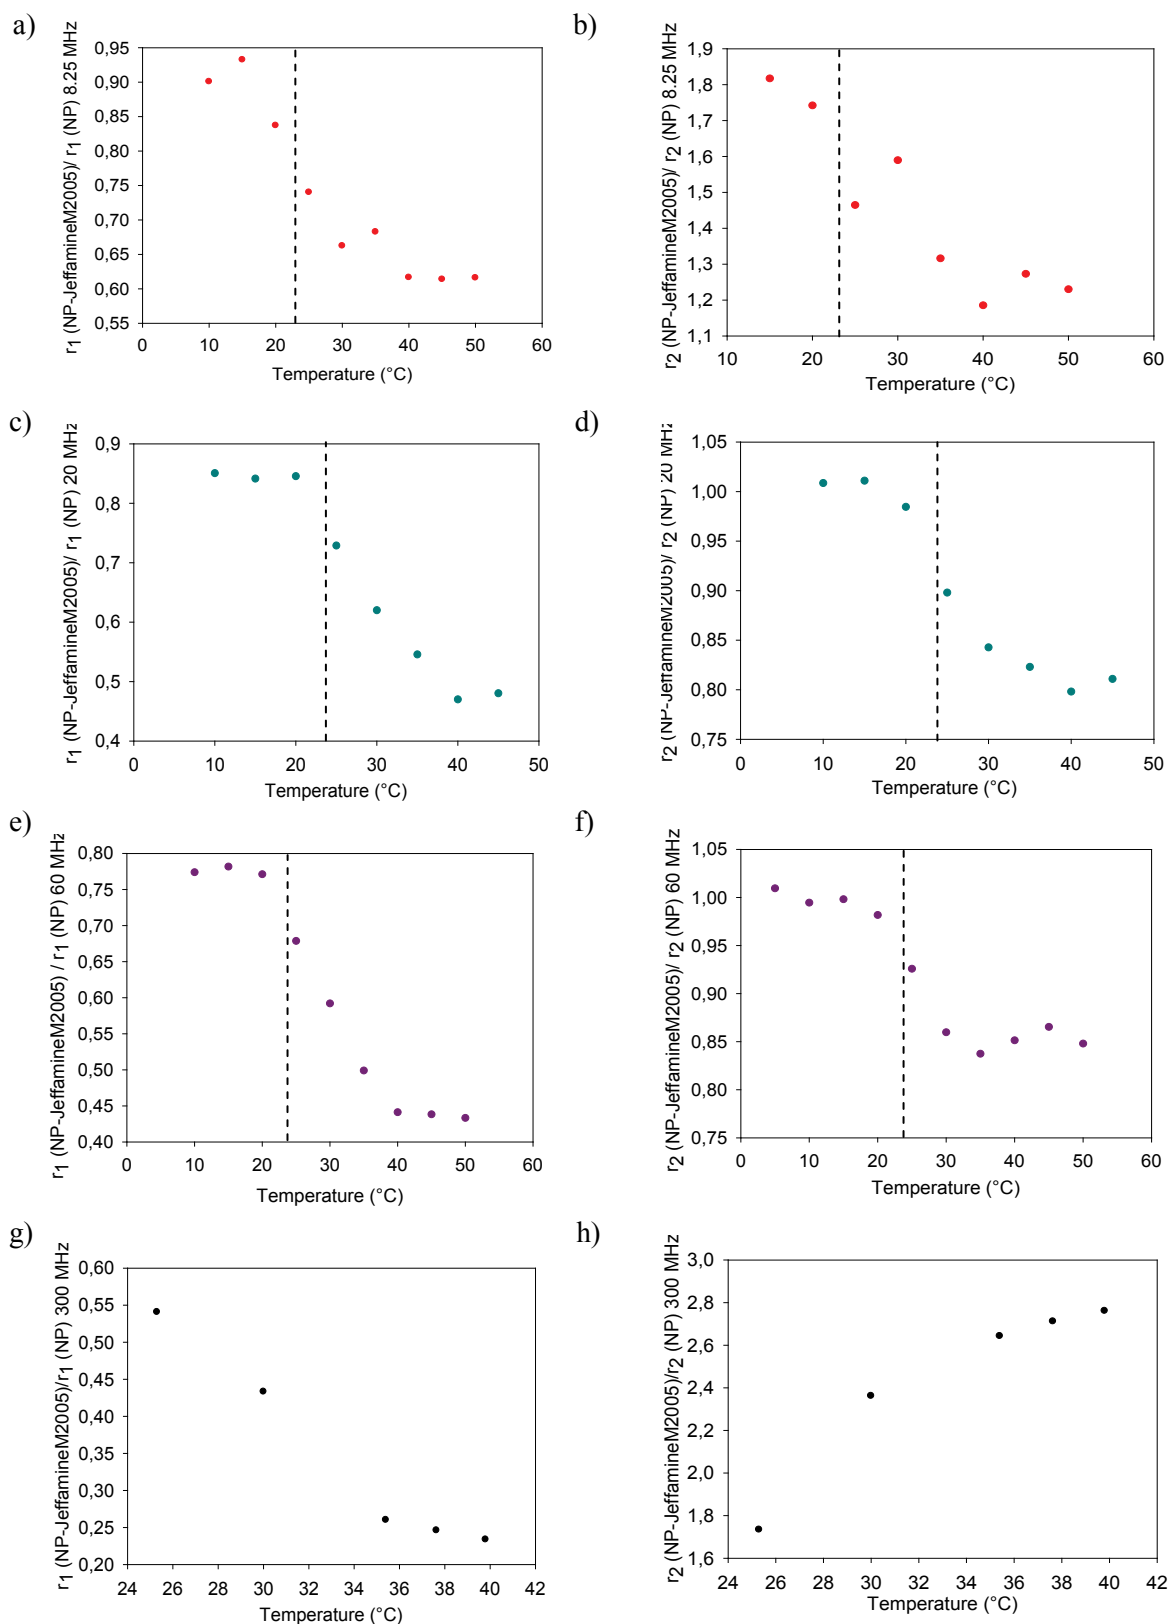

**Fig. S8** Longitudinal  $r_1$  (a, c, e, g) and transverse  $r_2$  (b, d, f, h) relaxivities of USPIOs grafted with Jeffamine<sup>®</sup> M-2005, normalized by the corresponding  $r_1$  or  $r_2$  of TEPSA-coated USPIOs, as functions of temperature from 10 to 50°C, for clinically relevant frequencies: 8.25 MHz (a, b), 20 MHz (c, d), 60 MHz (e, f), and 300 MHz (g, h). The vertical dotted lines show the position of the LCST of Jeffamine<sup>®</sup> M-2005, concomitant with an inflection of the curves of both the  $r_1$  and  $r_2$  relaxivities vs. temperature.
